# Supplementary material for: C1-inhibitor treatment in patients with severe complement-mediated autoimmune hemolytic anemia
Source: PubMed Central journal article supplement — Blood Adv. 2023 Mar 17;7(13):3128–39. doi: 10.1182/bloodadvances.2022009402 (PMC10362545; doi:10.1182/bloodadvances.2022009402), 2023-03-17
Supplement: BLOODA_ADV-2022-009402-mmc1.pdf [file BLOODA_ADV-2022-009402-mmc1.pdf]

**Supplemental Table 1: Full list of in- and exclusion criteria**

**Inclusion criteria**

- Positive ( $\geq 1+$ ) monospecific antiglobulin test for C3b and/or C3d *with/without* positivity for IgM OR strongly positive ( $\geq 3+$ ) monospecific antiglobulin test for C3b and/or C3d *with* positivity for IgG
- Indication for a transfusion with at least 2 red packed cell concentrates based on the clinical assessment by the hematologist in charge
- Hemoglobin value at least  $< 5$  mmol/L (8 g/dL) with/without clinical symptoms
- Clinical signs of hemolysis: not-detectable haptoglobin (mandatory) and increased lactate dehydrogenase (LDH) eventually combined with hyperbilirubinemia (increased direct and/or indirect bilirubin), lactate.
- Age  $\geq 18$  years
- Written informed consent
- Women of child bearing potential must have had a negative serum pregnancy test 7 days prior to the start of study drug

**Exclusion criteria**

- History of arterial and/or venous thromboembolic events in the absence of an actual treatment with Vitamin K-antagonists
- Concomitant use of therapeutic doses of heparin
- Female patients who are pregnant or breast feeding or adults of reproductive potential who are not using effective birth control methods. If barrier contraceptives are being used, these must be continued throughout the trial by both sexes. Oral contraceptives only are not acceptable.
- Patients with known HIV seropositivity or chronic active hepatitis
- Patients who have any severe and/or uncontrolled medical condition or other conditions that could affect their participation in the study such as:
  - o cerebrovascular accidents  $\leq 6$  months before study drug start
  - o uncontrolled hypertension

**Supplemental Table 2**

| <b>Case</b> | <b>Recent AIHA treatments</b>                                         |
|-------------|-----------------------------------------------------------------------|
| 1           | Prednisone, rituximab                                                 |
| 2           | Cyclosporine, mycophenolate, prednisone, rituximab                    |
| 3           | Prednisone, IVIG, rituximab, vincristine                              |
| 4           | Rituximab, bendamustine, prednisone, IVIG                             |
| 5           | Prednisone, darbepoetin, IVIG, rituximab                              |
| 6           | Darbepoetin                                                           |
| 7           | Prednisone, methylprednisone, rituximab, IVIG, darbepoetin, ibrutinib |
| 8           | Prednisone, rituximab, darbepoetin                                    |
| 9           | Rituximab, bortezomib, dexamethasone, epoetin bêta                    |
| 10          | Dexamethasone, prednisone, darbepoetin                                |

**Supplemental Table 2:** AIHA treatments for each patient in in the 2 months before inclusion in the current trial.

**Supplemental Table 3**

| <b>Adverse events</b>         | <b>Amount of patients</b>      | <b>Investigator causality assessment to study medication</b> |
|-------------------------------|--------------------------------|--------------------------------------------------------------|
| <b><u>Grade 1-2</u></b>       |                                |                                                              |
| Headache                      | 2                              | probable                                                     |
| Fever                         | 2                              | probable                                                     |
| Back pain                     | 2                              | possible                                                     |
| Non-cardiac chest pain        | 3                              | possible (2x), not related (1x)                              |
| Dry cough                     | 2                              | possible                                                     |
| Flushing                      | 1                              | possible                                                     |
| Dizziness                     | 1                              | possible                                                     |
| Diarrhea                      | 1                              | possible                                                     |
| Abdominal pain                | 2                              | possible (1x), not related (1x)                              |
| Flu-like symptoms             | 1                              | possible                                                     |
| Palpitations                  | 1                              | not related                                                  |
| Fatigue                       | 1                              | not related                                                  |
| Esophagitis                   | 2                              | not related                                                  |
| Conjunctivitis                | 1                              | not related                                                  |
| Edema limbs                   | 1                              | not related                                                  |
| Hematuria                     | 1                              | not related                                                  |
| Epistaxis                     | 1                              | not related                                                  |
| Oral candidiasis              | 1                              | not related                                                  |
| Dysarthria                    | 1                              | not related                                                  |
| Anxiety, depression           | 1                              | not related                                                  |
| Sore throat                   | 1                              | not related                                                  |
| Muscle atrophy                | 1                              | not related                                                  |
| Somnolence                    | 1                              | not related                                                  |
| Tingling sensation in fingers | 1                              | not related                                                  |
| Worsening hemolytic anemia    | 1                              | not related                                                  |
| White papillae tongue         | 1                              | not related                                                  |
| <b>Total</b>                  | <b>34 events in 7 patients</b> |                                                              |
| <b><u>Grade 3- 4</u></b>      |                                |                                                              |
| Constipation                  | 2                              | not related                                                  |
| Hypertension*                 | 1                              | not related                                                  |
| Hyponatremia*                 | 1                              | not related                                                  |
| Dyspnea†                      | 1                              | not related                                                  |
| Worsening hemolytic anemia    | 1                              | not related                                                  |
| <b>Total</b>                  | <b>6 events in 2 patients</b>  |                                                              |

**Supplemental table 3: Overview of all adverse events (AE)**

\* Related to renal failure

† Hypersensitivity reaction to pentamidine inhalation

### Supplemental Figure 1

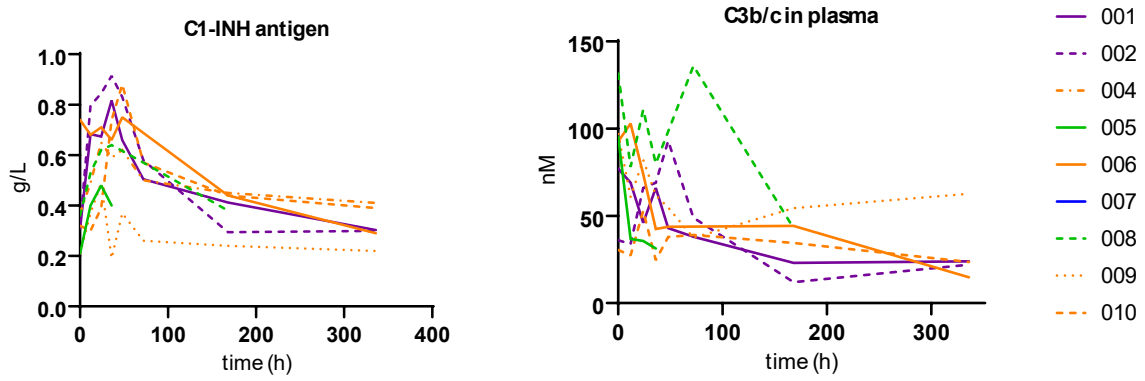

**Supplemental Figure 1: C1-INH response does not depend on bodyweight.** Exploratory analysis of C1-INH antigen (a) and C3b/c (b) levels for different U/kg bodyweight in the first dose. Green: 60-79 U/kg; orange: 80-99 U/kg; blue: 100-199 U/kg; purple: >120 U/kg.

Supplemental Figure 2

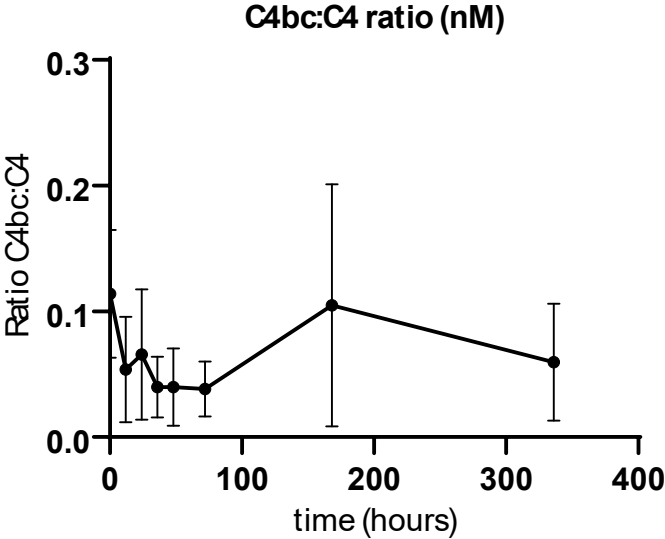

**Supplemental Figure 2: Ratio between C4b/c and C4.** The ratio between C4b/c and C4 does not change throughout the trial. Significance test there is only a low amount of C4b/c present compared to C4. Data expressed as median + IQR, significance tested using mixed effect analysis with Geisser-Greenhouse correction and Holm-Šídák's multiple comparisons test.
